# Supplementary material for: High cubicity of D2O ice inside spherical nanopores of MIL-101(Cr) framework: a neutron diffraction study
Source: Royal Society of Chemistry journal article supplement (doi:10.1039/d2cp00609j), 2022-01-01
Supplement: d2cp00609j1.pdf [file d2cp00609j1.pdf]

## Supporting Information (SI):

### 1. Structure of MIL-101(Cr) framework:

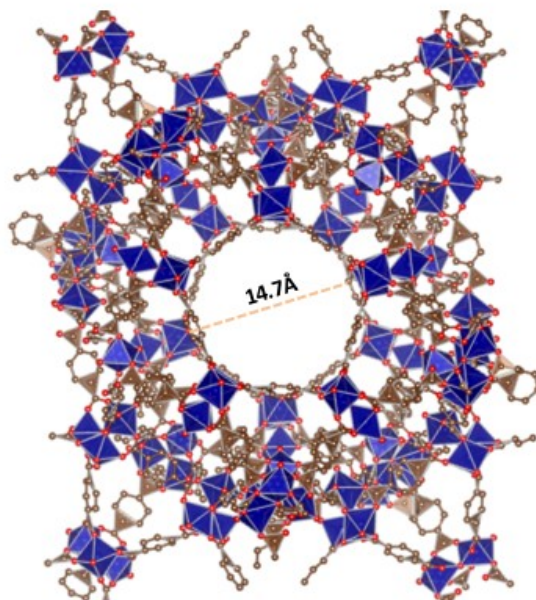

**Fig. 1s.** Schematic of MIL-101(Cr) framework

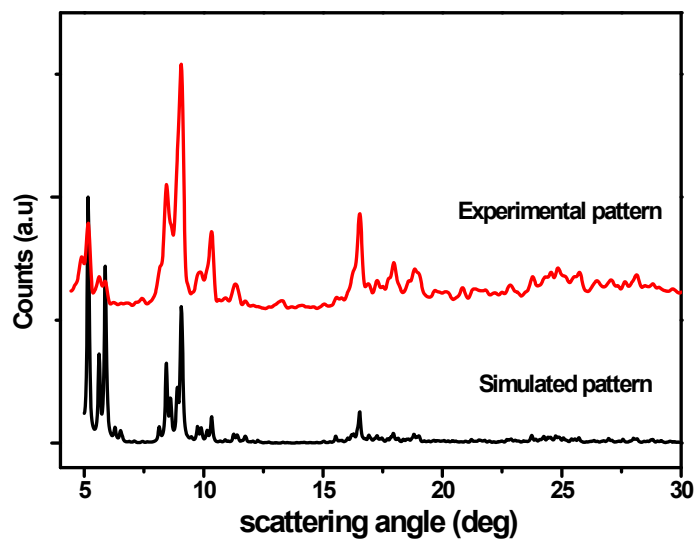

**Fig. 2s:** Powder X-ray diffraction pattern of the bare MIL-101(Cr) framework and comparison with the simulated pattern (Cu-K $\alpha$  radiation) at room temperature.

## 2. Pore size of MIL-101(Cr) framework:

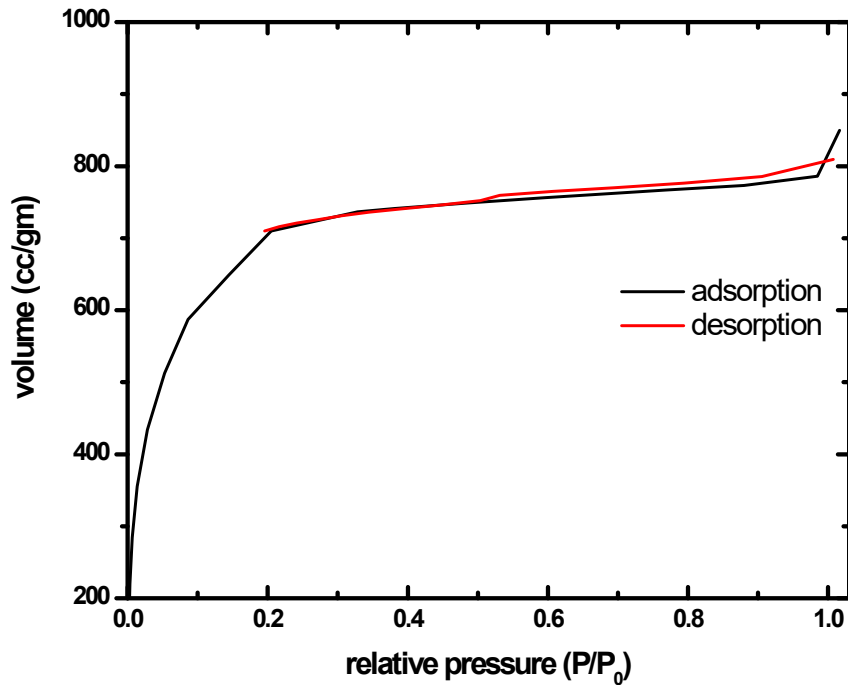

**Fig.3s.** BET nitrogen gas adsorption-desorption isotherm in MIL-101(Cr) framework.

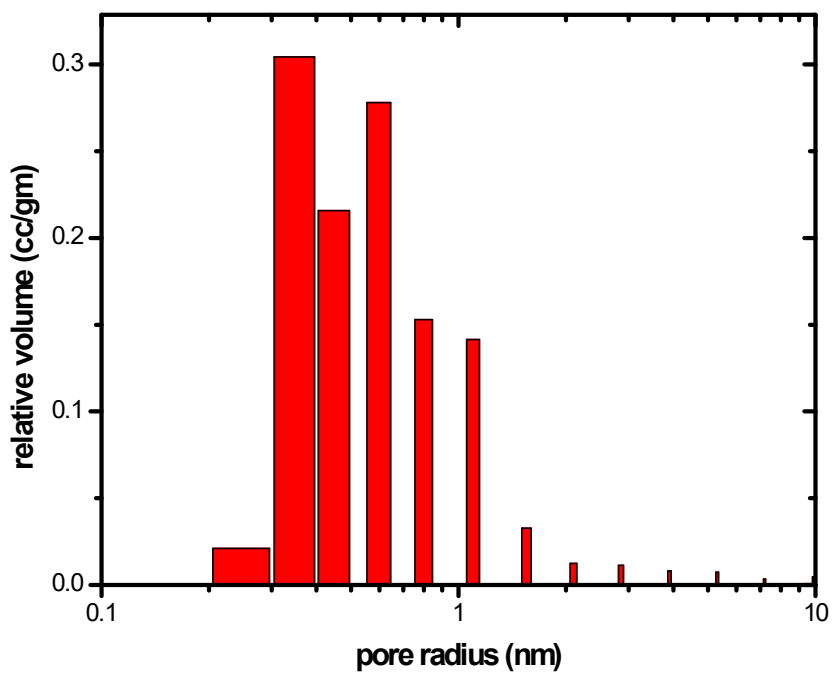

**Fig 4s:** Pore radius distribution in MIL-101(Cr) framework as obtained from BJH method in the desorption branch of BET nitrogen adsorption-desorption isotherm.

### 3. Variable energy positron annihilation spectroscopic result:

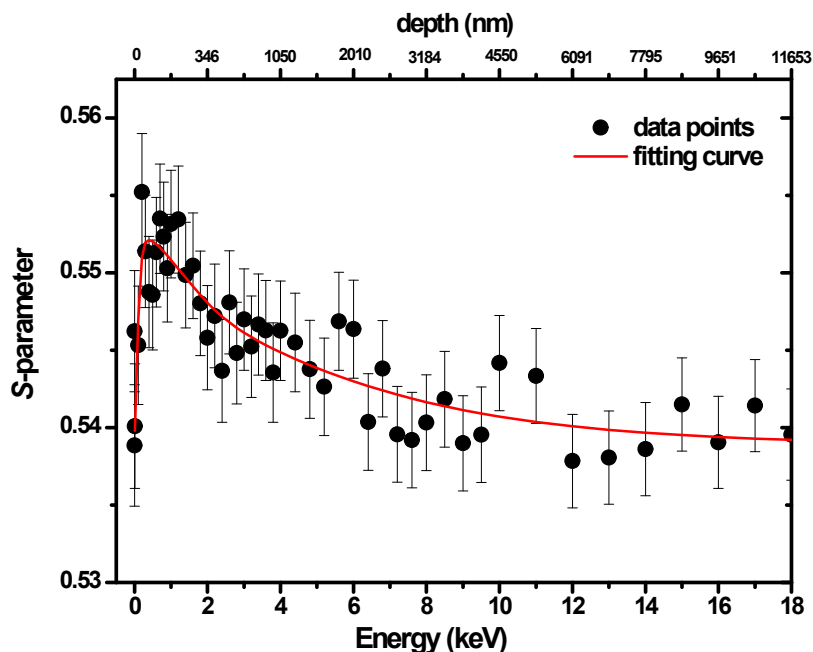

**Fig 5s.** Depth profile of  $S$ -parameter ( $S$ - $E$  profile) of MIL-101(Cr) film deposited on Si-substrate. The solid line shows the fitting of  $S$ - $E$  profile using VEPFIT analysis program. The estimated diffusion length of positronium (pore-interconnection length) by fitting the experimental data is found  $130\pm 30$  nm.

### 4. MIL-101(Cr) structure before and after water adsorption:

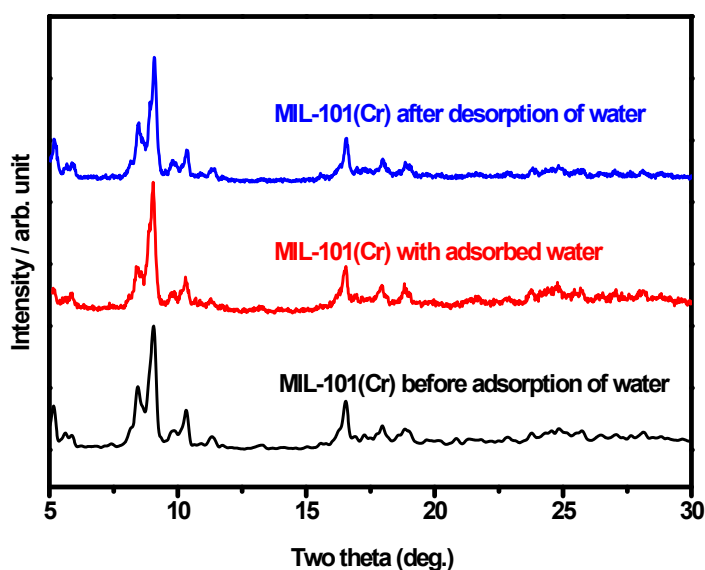

**Fig. 6s:** Comparison of XRD pattern of MIL-101(Cr) before and after water adsorption and desorption. The comparison shows that the structure of MIL-101(Cr) framework remains unchanged after adsorption and desorption of water.

4. Estimation of volume fraction of water monolayer inside the pore

Van der Waals radius of water molecule:  $1.7\text{\AA}$  [1].

Cross sectional area of water molecule  $=9.08\text{\AA}^2$

The specific pore surface area (from BET) of MIL-101  $=2564\text{ m}^2/\text{gm}$

Total number of water molecules to cover the pore surface  $=2564 \times 10^{20} / 9.08 = 280.4 \times 10^{20}$

Weight of monolayer water  $= 280.4 \times 10^{20} \times 18 / (6.023 \times 10^{23})$

$$= 840 \times 10^{-3} \text{ gm}$$

$$= 0.84 \text{ gm}$$

Volume of this amount of water  $= 0.84 \text{ cc}$

Specific pore volume (from BET) of MIL-101  $= 1.21 \text{ cc/gm}$

Volume fraction of monolayer water w.r.t. the pore volume  $= (0.84 / 1.21) \times 100$

$$= 70\%$$

Ref:

[1]. A. J. Li and R. Nussinov R. **Proteins**, 1998, **32(1)**:111-27. PMID: 9672047
